# Supplementary material for: Developing a green and efficient biosynthesis system for l-aspartic acid by addressing enzyme imbalance and catalysis-extraction circulation processes
Source: Royal Society of Chemistry journal article supplement (doi:10.1039/d3gc03050d), 2023-01-01
Supplement: d3gc03050d1.pdf [file d3gc03050d1.pdf]

**Table S1.** The catalytic parameters of MaiA and AspA

| Enzyme        | Specific activity<br>(U/mg) | Half-life <sup>a</sup><br>(d) | pH <sub>opt</sub> | T <sub>opt</sub><br>(°C) |
|---------------|-----------------------------|-------------------------------|-------------------|--------------------------|
| AspA          | 169.8                       | 28                            | 8.5               | 37                       |
| Original MaiA | 41.1                        | 2.5                           | 8.0               | 45                       |

<sup>a</sup>The experiments were performed at room temperature.

**Table S2.** Primers used for the construction of MaiA variants

| Primers | Sequence (5'→3')                           |
|---------|--------------------------------------------|
| A27M-F  | CCGGCGATGCTG <u>AT</u> GGCGCGCCAG          |
| A27M-R  | TCGGCGTCCATCGCCGCCAATT                     |
| I32F-F  | TGGCGGCGCGCCAGCTG <u>TTCC</u> GCCCGGAGC    |
| I32F-R  | TCGGCGTCCATCGCCGCCAATT                     |
| N50Y-F  | GCGCATGAAACACGTCT <u>ACA</u> AAAGAAGAAT    |
| N50Y-R  | TCGGCGTCCATCGCCGCCAATT                     |
| G77A-F  | GGTCGACGTGCTC <u>GCCT</u> ACGCCTG          |
| G77A-R  | CCATGATGGCCACCAGGCAG                       |
| Q96E-F  | CACCGCGAATCGG <u>AGG</u> CCCGGCTGG         |
| Q96E-R  | GATGACCGGCGCGGCGGCC                        |
| A100M-F | GGCCCGGCTG <u>AT</u> GCAAGTGACGAAAG        |
| A100M-R | GATGACCGGCGCGGCGGCC                        |
| A109F-F | GACGAAAGACAATCAGGCCT <u>TC</u> GCGCCGGTCAT |
| A109F-R | CGCGCCGGCGCTGCTGATGAC                      |
| N121M-F | GGCGCGCTGGTC <u>AT</u> GGGCCTGAAGGTG       |
| N121M-R | TCCATCTCGGCGACGATCC                        |
| A212F-F | GACGGTGGAG <u>TTCC</u> AAACCGGCAAAC        |
| A212F-R | CGGCGCCGGGAACGATCGGT                       |
| E234G-F | CTGACCGCGCTG <u>GGC</u> CTGGAACCGAT        |
| E234G-R | CGGCGCCGGGAACGATCGGT                       |

The mutation site were represented with an underline.

**Table S3.** Primers used for plasmid optimization

| Primers                          | Sequence (5'→3')                                                                                            |
|----------------------------------|-------------------------------------------------------------------------------------------------------------|
| RBS <sup>weakened</sup> -F       | CTTAGTATATTAGTTAAGTATAAG <u>CAGGAG</u> ATATACATATTCATATGTC                                                  |
| RBS <sup>weakened</sup> -R       | GACATATGAATATGTATATCTCCTGCTTATACTTAACTAATACTAAG<br><u>GGATGCTGCTGGCTACCCTGTGGAACCCCATCTTAGTATATTAGTTAAG</u> |
| AspA/ $\Delta$ T <sub>7</sub> -F | TATAAGAAGGAG                                                                                                |
| AspA/ $\Delta$ T <sub>7</sub> -R | <u>TTCCACAGGGTAGCCAGCAGCATCCATTTTCGATTATGCGGCCGTGTAC</u><br>AA                                              |
| MaiA/2T <sub>7</sub> -F          | <u>CTAATACGACTCACTATAGGGGCGACCGCATCAGGCGCTCTATGCGAC</u><br>TCCTGCATTAGGAAT                                  |
| MaiA/2T <sub>7</sub> -R          | <u>GAGCGCCTGATGCGGTCGCCCTATAGTGAGTCGTATTAGAGGGAGAG</u><br>CGTCGAGATCC                                       |
| MaiA/3T <sub>7</sub> -F          | <u>CAGGTCGTATAATACGACTCACTATAGGGGTCCACGAGTTGCGACTCC</u><br>TGCATTAGGAAT                                     |
| MaiA/3T <sub>7</sub> -R          | <u>ACTCGTGGACCCCTATAGTGAGTCGTATTATACGACCTGTAGAGCGCCT</u><br>GATGCGGTCG                                      |
| MaiA/5T <sub>7</sub> -F          | <u>GTCGTAACGTCATTCCAGTAATACGACTCACTATAGGCGACCGCATCA</u><br><u>GGTCGTAACGTCATTCCAGTAATACGACT</u>             |
| MaiA/5T <sub>7</sub> -R          | <u>CTGATGCGGTCGCCTATAGTGAGTCGTATTACTGGAATGACGTTACGA</u><br><u>CCTGATGCGGTCGCC</u>                           |
| 2MaiA-F                          | <u>CGCAGCCCGGACTCGGCCCTGTAGAAATAATTTTG</u>                                                                  |
| 2MaiA-R                          | <u>CCAACGCGCAGCCCGGACACGATTACTTTCTGTTTCGACT</u>                                                             |
| 2MaiA-vector-F                   | <u>CCGAGTCCGGGCTGCGCGACTTAAGCATTATGCGGC</u>                                                                 |
| 2MaiA-vector-R                   | <u>GTCCGGGCTGCGCGTTGGAACAGAAAGTAATCGTATTGTACACG</u>                                                         |
| 3MaiA-F                          | <u>GACGCACAATCCCACTATCCCATAATGCTTAAGTCGCGCAGC</u>                                                           |
| 3MaiA-R                          | <u>GCGCACACCGTGGGGCCAGGCGGACACGATTACTTTCTGTTTCGACTTA</u><br>AGC                                             |
| 3MaiA-vector-F                   | <u>CCTGGCCCCACGGTGTGCGCTGCGCGTTGGAACAGAAAGTAATC</u>                                                         |
| 3MaiA-vector-R                   | <u>GGATAGTGGGATTGTGCGTCCGGACACGATTACTTTCTGTTTCGACTTAA</u><br>G                                              |
| 4MaiA-F                          | <u>GGATCCCGCGAAATTAATACGAATGAACTCGAACATAGTCTTAAGGAG</u><br>GT                                               |
| 4MaiA-R                          | <u>TCGATGCTCTGGATCGCGAATTCAATAAGCGCCGGACAGCAG</u>                                                           |
| 4MaiA-vector-F                   | <u>ATTCGCGATCCAGAGCATCGACTGCGCGTTGGAACAGAAAGTAATCGT</u><br>ATTGTACAC                                        |
| 4MaiA-vector-R                   | <u>ATTCGTATTAATTTTCGCGGGATCCGCACACCGTGGGGCCAG</u>                                                           |

The mutation site were represented with an underline.

**Table S4.** Candidates of MaiA variants

| Variants | Fold X (kcal/mol) | Rosetta (kcal/mol) | Conserved |
|----------|-------------------|--------------------|-----------|
| A27M     | -1.25             | -16.81             | N         |
| Q30E     | -0.57             | -                  | N         |
| I32F     | -1.41             | -25.80             | N         |
| N50Y     | -1.36             | -21.38             | N         |
| G77A     | -1.06             | -12.38             | N         |
| Q96E     | -0.69             | -                  | N         |
| A100M    | -1.66             | -14.34             | N         |
| Q107G    | 0.05              | -                  | N         |
| A109F    | -1.01             | -14.36             | N         |
| A110L    | -1.42             | -7.33              | N         |
| S114T    | -1.53             | -                  | Y         |
| V120I    | -1.06             | -2.97              | N         |
| N121M    | -1.44             | -19.88             | N         |
| G122S    | -1.33             | -7.21              | N         |
| V134I    | -1.18             | -8.39              | N         |
| Q150E    | 0.03              | -                  | N         |
| D169E    | -0.81             | -                  | N         |
| G180Q    | -1.04             | -3.04              | N         |
| T209L    | -1.18             | -11.28             | N         |
| A212F    | -1.17             | -15.97             | N         |
| A228M    | -2.02             | -11.29             | N         |
| T231M    | -1.52             | -2.31              | N         |
| A232M    | -1.26             | -5.28              | N         |
| E234G    | -0.62             | -                  | N         |
| I238M    | -1.06             | -9.15              | N         |
| A244F    | -1.32             | -3.07              | N         |

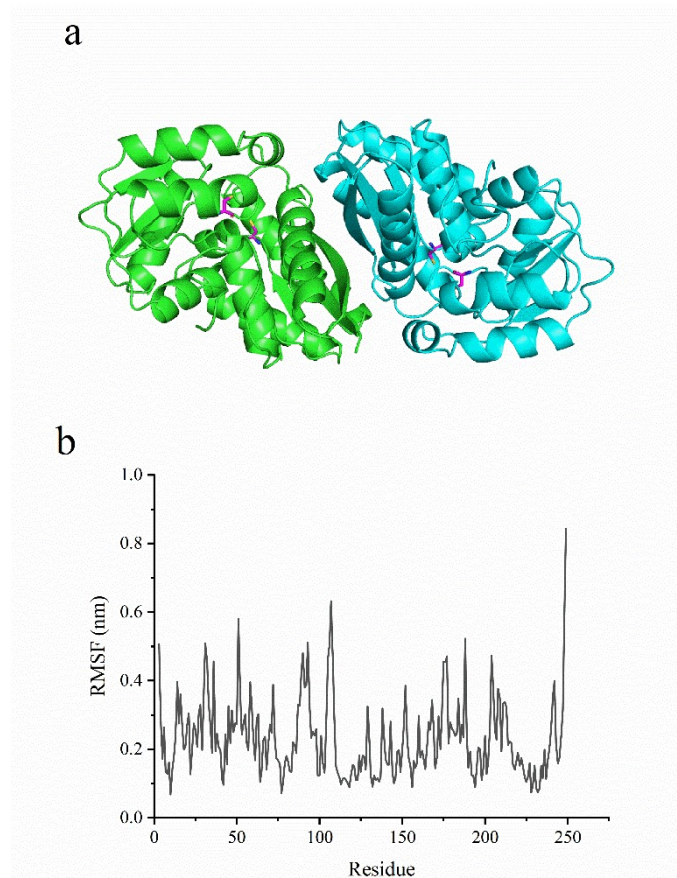

**Fig. S1.** Rational molecular redesign for the original MaiA. (a) The three-dimensional structure of the original MaiA that was generated using the SWISS-MODEL software. MaiA from *Pseudomonas putida* S16 (PDB: 4fq7) was used as a template, which showed 71.89% sequence identity. The active center was represented by two pink Cys residues involved in catalysis. (b) RMSF (root mean square fluctuation). Molecular dynamics simulations were performed on the original MaiA using NAMD 2.14 software at a temperature of 300 K.

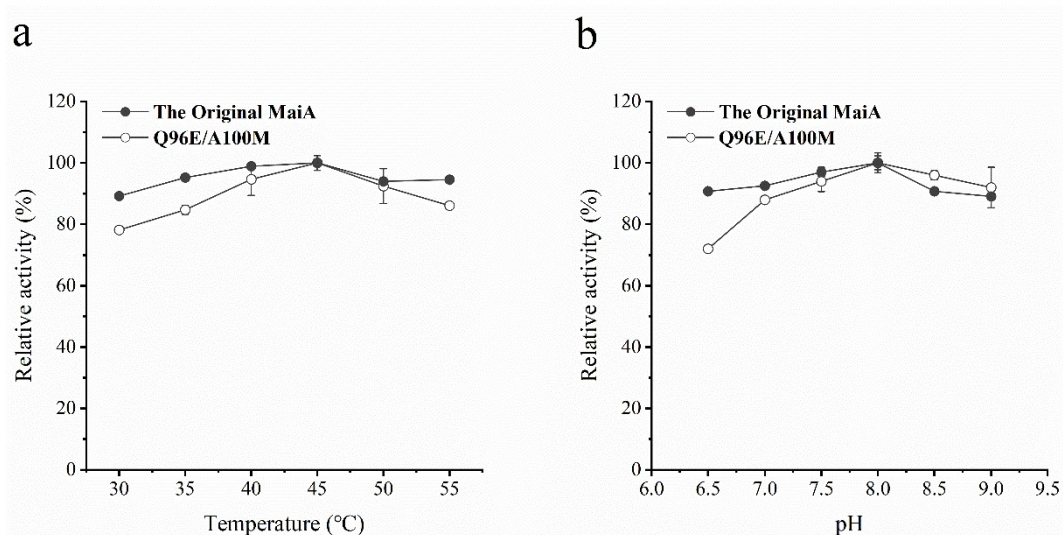

**Fig. S2.** The effect of temperature and pH on the activity of the Q96E/A100M variant. (a) The enzyme activity was assessed at various temperatures ranging from 30°C to 55°C to identify the optimal temperature. (b) The enzyme activity was evaluated at pH values of 6.5, 7.0, 7.5, 8.0, 8.5, and 9.0 to determine the optimal pH. These experiments were performed using pure enzymes, with the highest activity set as a reference of 100%. The reaction was carried out in Na<sub>2</sub>HPO<sub>4</sub>-KH<sub>2</sub>PO<sub>4</sub> buffer (20 mmol/L, pH 8.0) at 40°C for 10 min, followed by heat inactivation at 100°C for 10 min. After centrifugation, the supernatant was collected, appropriately diluted, and subjected to HPLC to determine the concentration of fumaric acid.

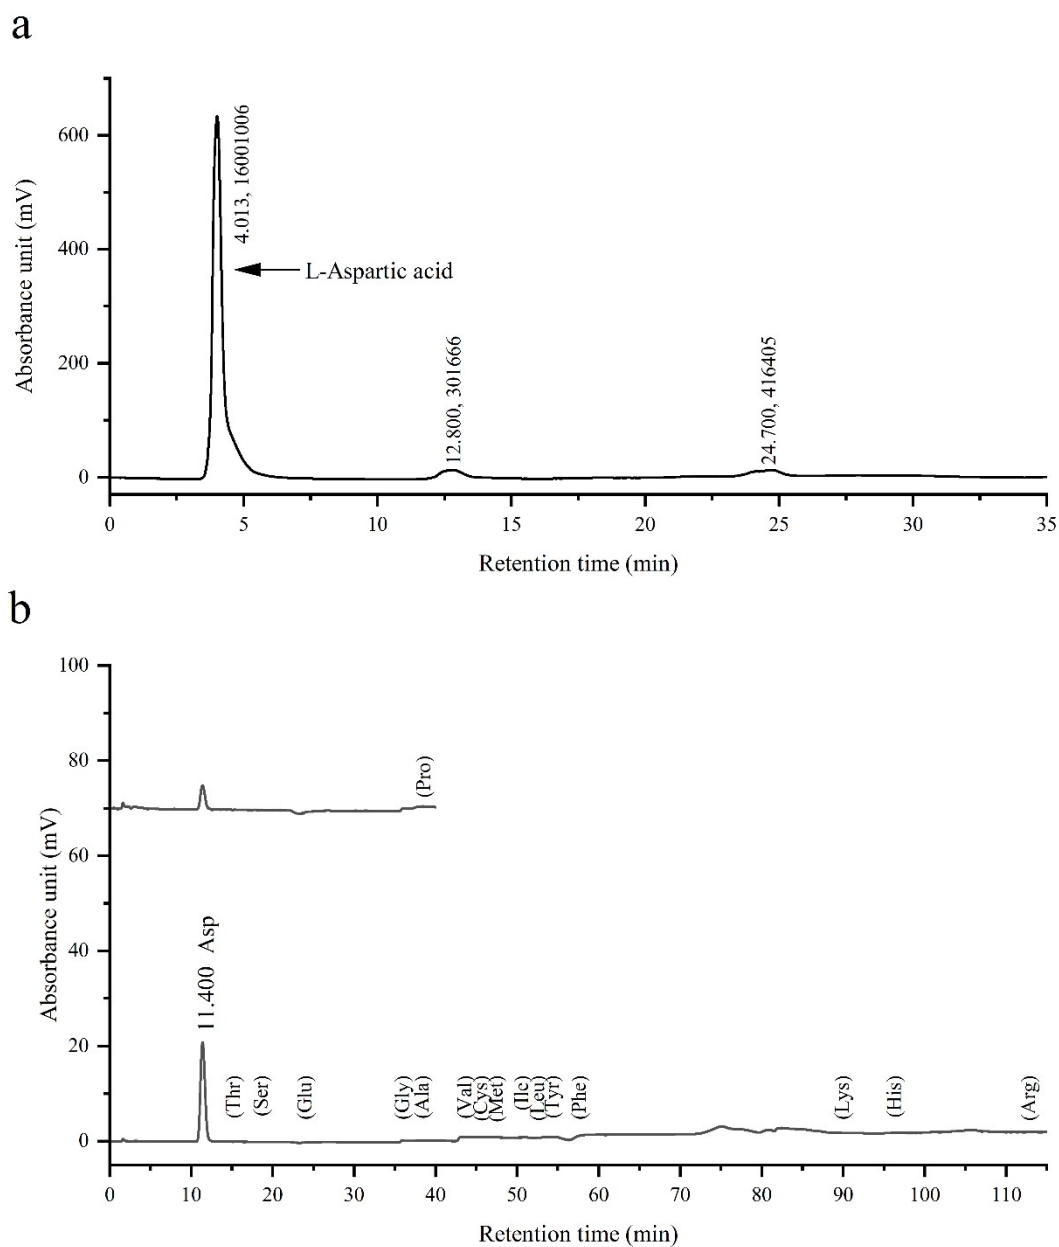

**Fig. S3.** Identification of the product purity. (a) The product of whole-cell catalysis was analyzed by HPLC using a La Chrom C18 column (4.6 mm×250 mm, 5  $\mu$ m) after PITC derivatization. (b) After precipitation and drying, the product is dissolved in hydrochloric acid and analyzed for purity using an amino acid analyzer (Hitachi L-8900, Japan).
